# Supplementary material for: Development of a disease risk perception assessment tool for first-degree relatives of patients with esophageal cancer in China: A study based on the modified Delphi method
Source: Research Square preprint supplement (doi:10.21203/rs.3.rs-6132977/v1), 2025-04-29
Supplement: Supplementary file 1 [file 22588e7db156b37daa18aeea.docx]

**Additional File 1**

**Expert consultation form for assessing esophageal cancer risk perception among first-degree relatives of patients.**

**(Round One)**

Dear Expert:

We are conducting a study on "Assessing Perceived Risk of Esophageal Cancer among First-Degree Relatives of Patients." Esophageal cancer is a common digestive tumor, ranking seventh in incidence among malignant tumors. Early screening and treatment can significantly lower its incidence and mortality rates. First-degree relatives (parents, children, and siblings) are at high risk for this cancer. However, there is currently no effective tool to evaluate their perception of disease risk comprehensively. This study aims to create items that identify gaps in behavioral interventions and implement more balanced strategies. Our goal is to enhance the cost-effectiveness of secondary prevention focused on early detection, diagnosis, and treatment.

Risk perception is how individuals feel and understand the various objective risks in the world, highlighting how personal experiences and feelings influence their cognition. By examining Chinese guidelines for esophageal cancer screening, diagnosis, treatment, and literature on disease risk perception and health behavior theories through semi-structured interviews with experts, we developed a framework based on the Health Belief Model to create five components of esophageal cancer risk perception: perceived susceptibility, perceived risk factors, perceived warning symptoms of the disease, perceived risk control, and perceived disease severity. - Perceived susceptibility refers to first-degree relatives' subjective judgment about their likelihood of developing esophageal cancer. - Perceived risk factors relate to their views on what increases this cancer's risk. - Perceived warning symptoms involve their understanding of signs indicating potential esophageal cancer. - Perceived risk control reflects their belief in managing these risks effectively. - Perceived disease severity pertains to their assessment of how serious esophageal cancer can be or its possible health impacts.

The design and validation of this item will occur in two stages: first, an expert consultation to gather professional feedback for improving the questionnaire; second, a small pre-experiment to test its reliability and validity before larger-scale application.

The initial draft includes 5 primary indicators and 42 secondary indicators. Given your expertise in esophageal cancer, we invite you to participate in this expert consultation. Please evaluate whether the questions can be used to assess risk perception of esophageal cancer among first-degree relatives of patients. Your suggestions will be crucial for our research. This consultation will occur over 2-3 rounds, starting with this one. We assure you that the questionnaire is for research purposes only, and your personal information will remain confidential.

Please reply by November 19th due to the project deadline. If you have questions while filling out the form, contact Yan He at 13651211255.

Thank you for your help and support! Wishing you good health and success in your work!

the First Department of Thoracic Surgery, Peking University Cancer Hospital

November 13, 2024

I have read the above content and agree to participate in this research.

Participants: _____________ Date:_____________

**Part One: Expert Information Form**

| Name |  | | Sex | | £Male £Female | | age | | ____years |
| --- | --- | --- | --- | --- | --- | --- | --- | --- | --- |
| Professional title | £Intermediate  £Deputy Senior  £Senior £Others | | | | | Location | |  | |
| Educational attainment | £Junior college and lower £Bachelor’s degree  £Master’s degree  £Doctor’s degree | | | | | Workplace | |  | |
| Types of expertise | £Nursing £Clinical £psychology  £Others___________________ | | | | | | | | |
| Professional years | ________years | | | | | | | | |
| Telephone |  | | | E-mail | |  | | | |
| 1. Please indicate your familiarity level with esophageal cancer：  A. Very familiar B. Familiar C. Generally familiar D. Unfamiliar  E. Not familiar at all  2. Your judgment on this issue may be influenced by five aspects. Each aspect's impact can be rated as strong, medium, or weak. Please mark "√" in the appropriate box based on your situation. | | | | | | | | | |
| Judgment basis | | The degree of influence on expert judgment | | | | | | | |
| Height | | | | medium | | Low | |
| Theoretical analysis | | £ | | | | £ | | £ | |
| Practical experience | | £ | | | | £ | | £ | |
| Reference materials search | | £ | | | | £ | | £ | |
| Intuitive choice | | £ | | | | £ | | £ | |

**Part Two: Expert Letter Inquiry Questionnaire**

This entry has two parts: primary indicators and secondary indicators. We seek your opinions on the importance of each indicator and target, rated as follows: 5 = Very important, 4 = Relatively important, 3 = Generally important, 2 = Not very important, 1 = Unimportant. Please mark "√" in the appropriate column. If you think there are additional indicators we haven't considered, please add them in the "Supplement" column. For any inappropriate or incorrect content that should be revised or deleted, please provide your suggestions in the "Revision Suggestions" column. Do not leave any items blank.

**Evaluation of primary items**

| Primary items | Importance level | | | | | Revisions and suggestions |
| --- | --- | --- | --- | --- | --- | --- |
|  | 5 | 4 | 3 | 2 | 1 |  |
| 1. Perceive disease susceptibility | £ | £ | £ | £ | £ |  |
| 1. Perceive risk factors | £ | £ | £ | £ | £ |  |
| 1. Perceive warning symptoms of diseases | £ | £ | £ | £ | £ |  |
| 1. Perception risk control | £ | £ | £ | £ | £ |  |
| 1. Perceive the severity of illness | £ | £ | £ | £ | £ |  |
| Suggested additional entries: | £ | £ | £ | £ | £ |  |
|  | £ | £ | £ | £ | £ |  |
|  | £ | £ | £ | £ | £ |  |

**Evaluation of secondary items**

| **Primary items** | **Secondary items** | **Importance level** | | | | | **Revisions and suggestions** |
| --- | --- | --- | --- | --- | --- | --- | --- |
|  |  | 5 | 4 | 3 | 2 | 1 |  |
| 1. **Perceive disease susceptibility** | 1.1 Having an immediate family member with esophageal cancer increases the risk of developing esophageal cancer. | £ | £ | £ | £ | £ |  |
| 1.2 My past and current lifestyle may put me at risk for esophageal cancer. | £ | £ | £ | £ | £ |  |
| 1.3 Due to my past or current environment, I may develop esophageal cancer. | £ | £ | £ | £ | £ |  |
| Suggested additional entries: | £ | £ | £ | £ | £ |  |
|  | £ | £ | £ | £ | £ |  |
|  | £ | £ | £ | £ | £ |  |
| 1. **Perceive risk factors** | 2.1 Men are at a higher risk of esophageal cancer than women. | £ | £ | £ | £ | £ |  |
| 2.2 The risk of developing esophageal cancer increases with age. | £ | £ | £ | £ | £ |  |
| 2.3 A family history of esophageal cancer raises the risk of developing the disease. | £ | £ | £ | £ | £ |  |
| 2.4 A history of Helicobacter pylori infection, gastroesophageal reflux disease (GERD), esophageal ulcers, oral diseases (like tooth loss and inflammation), and previous head or neck tumors can increase the risk of esophageal cancer. | £ | £ | £ | £ | £ |  |
| 2.5 Alcohol consumption increases the risk of developing esophageal cancer. | £ | £ | £ | £ | £ |  |
| 2.6 Smoking increases the risk of esophageal cancers. | £ | £ | £ | £ | £ |  |
| 2.7 Lack of exercise raises the risk of esophageal cancer. | £ | £ | £ | £ | £ |  |
| 2.8 Being overweight or obese raises the risk of esophageal cancer. | £ | £ | £ | £ | £ |  |
| 2.9 A lack of nutrients, such as vitamins and minerals, can increase the risk of esophageal cancer. | £ | £ | £ | £ | £ |  |
| 2.10 Living in a harmful environment, like one with chemical pollutants or radiation, increases the risk of esophageal. | £ | £ | £ | £ | £ |  |
| 2.11 Unhealthy eating habits, like a love for pickled foods, irregular meal times, moldy food, preference for hot dishes, high salt intake, fast eating, and consuming sauerkraut can raise the risk of esophageal cancer. |  |  |  |  |  |  |
| Suggested additional entries: | £ | £ | £ | £ | £ |  |
|  | £ | £ | £ | £ | £ |  |
|  | £ | £ | £ | £ | £ |  |
| 1. **Perceive warning symptoms of diseases** | 3.1 There is a feeling of something stuck in the esophagus. | £ | £ | £ | £ | £ |  |
| 3.2 A dry and tight feeling in the throat. | £ | £ | £ | £ | £ |  |
| 3.3 Gastrointestinal symptoms include belching, heartburn, and acid reflux. | £ | £ | £ | £ | £ |  |
| 3.4 Reflux can happen after eating. | £ | £ | £ | £ | £ |  |
| 3.5 Feeling of choking while swallowing. | £ | £ | £ | £ | £ |  |
| 3.6 The food moves slowly and feels stagnant. | £ | £ | £ | £ | £ |  |
| 3.7 There is a dull, uncomfortable feeling behind the sternum. | £ | £ | £ | £ | £ |  |
| 3.8 There is pain behind the sternum. | £ | £ | £ | £ | £ |  |
| 3.9 Hematochezia or anemia. | £ | £ | £ | £ | £ |  |
| 3.10 Respiratory symptoms include cough, phlegm, and chest tightness. | £ | £ | £ | £ | £ |  |
| 3.11 Fever | £ | £ | £ | £ | £ |  |
| 3.12 Malnutrition: Emaciation | £ | £ | £ | £ | £ |  |
| Suggested additional entries: | £ | £ | £ | £ | £ |  |
|  | £ | £ | £ | £ | £ |  |
|  | £ | £ | £ | £ | £ |  |
| 1. **Perception risk**   **control** | 4.1 Esophageal cancer is preventable. | £ | £ | £ | £ | £ |  |
| 4.2 Early detection, diagnosis, and treatment can cure one-third of cancers. | £ | £ | £ | £ | £ |  |
| 4.3 Change unhealthy habits to prevent esophageal cancer. | £ | £ | £ | £ | £ |  |
| 4.4 Learn how to prevent esophageal cancer and address bad habits early. | £ | £ | £ | £ | £ |  |
| 4.5 Learn about esophageal cancer and recognize its early signs. | £ | £ | £ | £ | £ |  |
| 4.6 A good mental state can help prevent esophageal cancer. | £ | £ | £ | £ | £ |  |
| 4.7 Staying away from harmful living environments can help prevent esophageal cancer. | £ | £ | £ | £ | £ |  |
| 1. **Perceive the**   **severity of illness** | 5.1 Esophageal cancer can create a significant financial burden for families. | £ | £ | £ | £ | £ |  |
| 5.2 Esophageal cancer can create a significant mental burden for families. | £ | £ | £ | £ | £ |  |
| 5.3 Esophageal cancer creates a significant psychological burden for me. | £ | £ | £ | £ | £ |  |
| 5.4 The treatment for esophageal cancer causes bodily discomfort. | £ | £ | £ | £ | £ |  |
| 5.5 Delaying treatment for esophageal cancer will lead to poor outcomes | £ | £ | £ | £ | £ |  |
| 5.6 Esophageal cancer can be life-threatening if not treated promptly. | £ | £ | £ | £ | £ |  |
| 5.7 Esophageal cancer can reduce quality of life. | £ | £ | £ | £ | £ |  |
| 5.8 Esophageal cancer can reduce social participation. | £ | £ | £ | £ | £ |  |
| 5.9 Esophageal cancer can impact family responsibilities. | £ | £ | £ | £ | £ |  |
|  | Suggested additional entries: | £ | £ | £ | £ | £ |  |
|  |  | £ | £ | £ | £ | £ |  |
|  |  | £ | £ | £ | £ | £ |  |
