# Supplementary material for: Development of a disease risk perception assessment tool for first-degree relatives of patients with esophageal cancer in China: A study based on the modified Delphi method
Source: Research Square preprint supplement (doi:10.21203/rs.3.rs-6132977/v1), 2025-04-29
Supplement: Supplementary file 2 [file 75d07defaa5508eee2186a1c.docx]

**Additional File 2**

**Expert inquiry questionnaire on perceived risk of esophageal cancer for first-degree relatives of patients.**

**(Second Round)**

**Part One: Letter to Experts**

Dear Expert:

Thank you for your valuable suggestions during the first round of expert consultation, which will greatly help optimize this project. A total of 20 experts participated, and we have carefully analyzed their feedback. Based on these insights and our research context, we made necessary adjustments after team discussions.

The Risk Perception Attitude framework views risk perception as a two-dimensional factor of motivation for change, consisting of perceived susceptibility and perceived severity. Following feedback from the first round of experts and discussions within the research team, we reorganized and classified the content and logic of the items. Initially, there were five first-level indicators; three were removed. Out of 42 second-level indicators, 6 were consolidated, 8 added, and 18 deleted. After this revision, there are now two first-level indicators and 26 second-level indicators. Details on these adjustments can be found in Attachment 1: Responses to Expert Consultation Feedback.

The perceived susceptibility dimension includes two aspects: first, the subjective assessment of esophageal cancer risk based on individual and family health history; second, the objective risks posed by external factors like unhealthy habits and poor living conditions. The perceived severity dimension also has two aspects: first, the physical and psychological discomfort experienced due to esophageal cancer; second, its significant impact on individuals, families, and society. Given your expertise, we invite you to provide further revisions for the "Construction of Items for Perceived Risk of Esophageal Cancer among First-Degree Relatives of Esophageal Cancer Patients." This consultation consists of a Letter to Experts and an Expert Consultation Questionnaire. Your support is crucial for my research's success, and your suggestions will help improve understanding of esophageal cancer risk among first-degree relatives. We assure you that this questionnaire is solely for research purposes, and your personal information will remain confidential.

Please reply by December 10th due to the project deadline. If you have questions while filling out the form, contact Yan He at 13651211255.

Thank you for your help and support! Wishing you good health and success in your work!

the First Department of Thoracic Surgery, Peking University Cancer Hospital

December 5, 2024

I have read the above content and agree to participate in this research.

Participants: _____________ Date:_____________

**Part Two: Expert Letter Inquiry Questionnaire**

This section includes primary and secondary indicators. We seek your opinions on the importance of each indicator and objective, rated as follows: 5 = Very important, 4 = Relatively important, 3 = Generally important, 2 = Not very important, 1 = Unimportant. Please mark "√" in the appropriate column. If you believe there are additional indicators we haven't considered, please add them in the "Supplement" column. For any inappropriate content or suggestions for deletion or addition, write your feedback in the "Revision Suggestions" column. Please do not leave any items blank.

**Evaluation of primary items**

| Primary items | Importance level | | | | | Revisions and suggestions |
| --- | --- | --- | --- | --- | --- | --- |
|  | 5 | 4 | 3 | 2 | 1 |  |
| 1. Perceive disease susceptibility | £ | £ | £ | £ | £ |  |
| 1. Perceive the severity of illness | £ | £ | £ | £ | £ |  |
| Suggested additional entries: | £ | £ | £ | £ | £ |  |
|  | £ | £ | £ | £ | £ |  |
|  | £ | £ | £ | £ | £ |  |

**Evaluation of secondary items**

| **Primary items** | **Secondary items** | **Importance level** | | | | | **Revisions and suggestions** |
| --- | --- | --- | --- | --- | --- | --- | --- |
|  |  | 5 | 4 | 3 | 2 | 1 |  |
| 1. **Perceive disease susceptibility** | 1.1 Having an immediate family member with esophageal cancer increases the risk of developing esophageal cancer. | £ | £ | £ | £ | £ |  |
| 1.2 The risk of developing esophageal cancer increases with age. | £ | £ | £ | £ | £ |  |
| 1.3 Having an esophageal condition (such as chronic esophagitis, esophageal intraepithelial neoplasia, Barrett's esophagus, etc.) increases the risk of developing esophageal cancer. | £ | £ | £ | £ | £ |  |
| 1.4 Poor oral hygiene or having oral disease can increase the risk of developing esophageal cancer. |  |  |  |  |  |  |
| 1.5 Alcohol consumption increases the risk of developing esophageal cancer. |  |  |  |  |  |  |
| 1.6 Smoking increases the risk of esophageal cancer. |  |  |  |  |  |  |
| 1.7 Long-term unreasonable diet (such as consumption of pickled food, hot food, etc.) can increase the risk of esophageal cancer. |  |  |  |  |  |  |
| 1.8 Long-term poor eating habits (such as eating too fast, eating irregularly, etc.) increase the risk of developing esophageal cancer. |  |  |  |  |  |  |
| 1.9 Living in a poor living environment (exposure to chemical pollutants, radiation, etc.) can increase the risk of developing esophageal cancer. |  |  |  |  |  |  |
| 1.10 Long-term residence in an area with a high incidence of esophageal cancer increases the risk of developing esophageal cancer. |  |  |  |  |  |  |
| Suggested additional entries: | £ | £ | £ | £ | £ |  |
|  | £ | £ | £ | £ | £ |  |
|  | £ | £ | £ | £ | £ |  |
| 1. **Perceive the severity of illness** | 2.1 Esophageal cancer is a serious disease. | £ | £ | £ | £ | £ |  |
| 2.2 Esophageal cancer can present with the sensation of a foreign body or stagnation in the esophagus. | £ | £ | £ | £ | £ |  |
| 2.3 Esophageal cancer can present with progressive difficulty in swallowing. | £ | £ | £ | £ | £ |  |
| 2.4 Esophageal cancer may be accompanied by gastrointestinal symptoms such as belching and reflux. | £ | £ | £ | £ | £ |  |
| 2.5 Esophageal cancer can present with pain in the retrosternal or interscapular region. | £ | £ | £ | £ | £ |  |
| 2.6 Esophageal cancer can cause malnutrition and weight loss. | £ | £ | £ | £ | £ |  |
| 2.7 Esophageal cancer carries a risk of metastasis and spread. | £ | £ | £ | £ | £ |  |
| 2.8 Esophageal cancer carries a risk of recurrence. | £ | £ | £ | £ | £ |  |
| 2.9 Multiple complications may occur during the treatment of esophageal cancer. | £ | £ | £ | £ | £ |  |
| 2.10 Delayed treatment of esophageal cancer is associated with poor efficacy. | £ | £ | £ | £ | £ |  |
| 2.11 The treatment of esophageal cancer can cause physical discomfort. |  |  |  |  |  |  |
| 2.12 Esophageal cancer can lead to a decreased quality of life. |  |  |  |  |  |  |
| 2.13 Esophageal cancer can lead to reduced social participation. |  |  |  |  |  |  |
| 2.14 Esophageal cancer can interfere with taking on original family responsibilities. |  |  |  |  |  |  |
| 2.15 Treatment of esophageal cancer can cause a financial burden to the family. |  |  |  |  |  |  |
| 2.16 A diagnosis of esophageal cancer can place a psychological burden on family members. |  |  |  |  |  |  |
| Suggested additional entries: | £ | £ | £ | £ | £ |  |
|  | £ | £ | £ | £ | £ |  |
|  | £ | £ | £ | £ | £ |  |
