# Supplementary material for: Development of a disease risk perception assessment tool for first-degree relatives of patients with esophageal cancer in China: A study based on the modified Delphi method
Source: Research Square preprint supplement (doi:10.21203/rs.3.rs-6132977/v1), 2025-04-29
Supplement: Supplementary file 3 [file b10fb6a96f1580f1a38f7df4.docx]

**Additional File 3**

**Table S1**. Results of the first of expert consultation on the proposed items

| Item | Significance | | Selection rate | Full score ratio | Outcome |
| --- | --- | --- | --- | --- | --- |
| X ± SD | CV |
| 1. **Perceive disease susceptibility** | 4.75±0.44 | 0.093 | 100 | 75 | Accepted |
| 1.1 Having an immediate family member with esophageal cancer increases the risk of developing esophageal cancer. | 4.80±0.41 | 0.085 | 100 | 80 | Accepted |
| 1.2 My past and current lifestyle may put me at risk for esophageal cancer. | 4.75±0.44 | 0.093 | 100 | 75 | Deleted |
| 1.3 Due to my past or current environment, I may develop esophageal cancer. | 4.55±0.61 | 0.133 | 95 | 60 | Deleted |
| 1. **Perceive risk factors** | 4.90±0.31 | 0.063 | 100 | 90 | Deleted |
| 2.1 Men are at a higher risk of esophageal cancer than women. | 4.55±0.83 | 0.182 | 90 | 70 | Deleted |
| 2.2 The risk of developing esophageal cancer increases with age. | 4.10±0.97 | 0.236 | 80 | 40 | Accepted |
| 2.3 A family history of esophageal cancer raises the risk of developing the disease. | 4.75±0.44 | 0.093 | 100 | 75 | Deleted |
| 2.4 A history of Helicobacter pylori infection, gastroesophageal reflux disease, esophageal ulcers, oral diseases (like tooth loss and inflammation), and previous head or neck tumors can increase the risk of esophageal cancer. | 4.75±0.44 | 0.093 | 100 | 75 | Accepted |
| 2.5 Alcohol consumption increases the risk of developing esophageal cancer. | 4.70±0.57 | 0.121 | 95 | 75 | Accepted |
| 2.6 Smoking increases the risk of esophageal cancers. | 4.60±0.75 | 0.164 | 95 | 70 | Accepted |
| 2.7 Lack of exercise raises the risk of esophageal cancer. | 3.55±1.32 | 0.371 | 65 | 25 | Deleted |
| 2.8 Being overweight or obese raises the risk of esophageal cancer. | 3.95±0.95 | 0.239 | 65 | 35 | Deleted |
| 2.9 A lack of nutrients, such as vitamins and minerals, can increase the risk of esophageal cancer. | 4.05±1.15 | 0.283 | 75 | 45 | Deleted |
| 2.10 Living in a harmful environment, like one with chemical pollutants or radiation, increases the risk of esophageal. | 4.55±0.51 | 0.112 | 100 | 55 | Accepted |
| 2.11 Unhealthy eating habits, like a love for pickled foods, irregular meal times, moldy food, preference for hot dishes, high salt intake, fast eating, and consuming sauerkraut can raise the risk of esophageal cancer. | 4.85±0.37 | 0.075 | 100 | 85 | Accepted |
| 1. **Perceive warning symptoms of diseases** | 4.90±0.31 | 0.063 | 100 | 90 | Deleted |
| 3.1 There is a feeling of something stuck in the esophagus. | 4.95±0.22 | 0.045 | 100 | 95 | Accepted |
| 3.2 A dry and tight feeling in the throat. | 4.60±0.68 | 0.148 | 90 | 70 | Deleted |
| 3.3 Gastrointestinal symptoms include belching, heartburn, and acid reflux. | 4.35±0.93 | 0.214 | 80 | 60 | Deleted |
| 3.4 Reflux can happen after eating. | 4.50±0.89 | 0.198 | 85 | 70 | Accepted |
| 3.5 Feeling of choking while swallowing. | 5.00±0.00 | 0 | 100 | 100 | Accepted |
| 3.6 The food moves slowly and feels stagnant. | 5.00±0.00 | 0 | 100 | 100 | Accepted |
| 3.7 There is a dull, uncomfortable feeling behind the sternum. | 4.55±0.69 | 0.151 | 90 | 65 | Accepted |
| 3.8 There is pain behind the sternum. | 4.55±0.83 | 0.182 | 90 | 70 | Accepted |
| 3.9 Hematochezia or anemia. | 3.75±1.16 | 0.310 | 65 | 30 | Deleted |
| 3.10 Respiratory symptoms include cough, phlegm, and chest tightness. | 3.45±1.40 | 0.404 | 60 | 25 | Deleted |
| 3.11 Fever | 3.25±1.25 | 0.385 | 55 | 10 | Deleted |
| 3.12 Malnutrition: Emaciation | 4.50±1.10 | 0.244 | 90 | 75 | Accepted |
| 1. **Perception risk control** | 4.80±0.41 | 0.085 | 100 | 80 | Deleted |
| 4.1 Esophageal cancer is preventable. | 4.25±1.33 | 0.314 | 85 | 65 | Deleted |
| 4.2 Early detection, diagnosis, and treatment can cure one-third of cancers. | 4.75±0.71 | 0.151 | 95 | 85 | Deleted |
| 4.3 Change unhealthy habits to prevent esophageal cancer. | 4.90±0.31 | 0.063 | 100 | 90 | Deleted |
| 4.4 Learn how to prevent esophageal cancer and address bad habits early. | 4.90±0.45 | 0.091 | 100 | 95 | Deleted |
| 4.5 Learn about esophageal cancer and recognize its early signs. | 4.85±0.49 | 0.101 | 95 | 90 | Deleted |
| 4.6 A good mental state can help prevent esophageal cancer. | 4.60±0.82 | 0.178 | 90 | 75 | Deleted |
| 4.7 Staying away from harmful living environments can help prevent esophageal cancer. | 4.75±0.55 | 0.116 | 95 | 80 | Deleted |
| 1. **Perceive the severity of illness** | 4.75±0.44 | 0.093 | 100 | 75 | Accepted |
| 5.1 Esophageal cancer can create a significant financial burden for families. | 4.80±0.41 | 0.085 | 100 | 80 | Accepted |
| 5.2 Esophageal cancer can create a significant mental burden for families. | 4.75±0.44 | 0.093 | 100 | 75 | Accepted |
| 5.3 Esophageal cancer creates a significant psychological burden for me. | 4.75±0.44 | 0.093 | 100 | 75 | Accepted |
| 5.4 The treatment for esophageal cancer causes bodily discomfort | 4.75±0.44 | 0.093 | 100 | 75 | Accepted |
| 5.5 Delaying treatment for esophageal cancer will lead to poor outcomes. | 4.75±0.55 | 0.116 | 95 | 80 | Accepted |
| 5.6 Esophageal cancer can be life-threatening if not treated promptly. | 4.80±0.52 | 0.109 | 95 | 85 | Accepted |
| 5.7 Esophageal cancer can reduce quality of life. | 4.85±0.37 | 0.075 | 100 | 85 | Accepted |
| 5.8 Esophageal cancer can reduce social participation. | 4.50±0.69 | 0.153 | 90 | 60 | Accepted |
| 5.9 Esophageal cancer can impact family responsibilities. | 4.40±0.82 | 0.187 | 80 | 60 | Accepted |

SD, standard deviation; CV, coefficient of variation

Originally, there were 5 first-level items, but 3 were removed. There were initially 42 second-level items; after merging, 6 were reduced, 8 added, and 18 deleted. Then the item text was adjusted. After the first revision round, there are now 2 first-level and 26 second-level items.

**Table S2**. Results of the second of expert consultation on the proposed items

| Item | Significance | | Selection rate | Full score ratio | Outcome |
| --- | --- | --- | --- | --- | --- |
| X ± SD | CV |
| 1. **Perceive disease susceptibility** | 5.00 ± 0.00 | 0.000 | 100 | 100 | Accepted |
| 1.1 Having an immediate family member with esophageal cancer increases the risk of developing esophageal cancer. | 5.00 ± 0.00 | 0.000 | 100 | 100 | Accepted |
| 1.2 The risk of developing esophageal cancer increases with age. | 4.30 ± 0.47 | 0.109 | 100 | 30 | Accepted |
| 1.3 Having an esophageal condition (such as chronic esophagitis, esophageal intraepithelial neoplasia, Barrett's esophagus, etc.) increases the risk of developing esophageal cancer. | 4.40 ± 0.50 | 0.114 | 100 | 40 | Accepted |
| 1.4 Poor oral hygiene or having oral disease can increase the risk of developing esophageal cancer. | 5.00 ± 0.00 | 0.000 | 100 | 100 | Accepted |
| 1.5 Alcohol consumption increases the risk of developing esophageal cancer. | 5.00 ± 0.00 | 0.000 | 100 | 100 | Accepted |
| 1.6 Smoking increases the risk of esophageal cancer. | 4.60 ± 0.50 | 0.109 | 100 | 60 | Accepted |
| 1.7 Long-term unreasonable diet (such as consumption of pickled food, hot food, etc.) can increase the risk of esophageal cancer. | 4.35 ± 0.49 | 0.112 | 100 | 35 | Accepted |
| 1.8 Long-term poor eating habits (such as eating too fast, eating irregularly, etc.) increase the risk of developing esophageal cancer. | 5.00 ± 0.00 | 0.000 | 100 | 100 | Accepted |
| 1.9 Living in a poor living environment (exposure to chemical pollutants, radiation, etc.) can increase the risk of developing esophageal cancer. | 4.25 ± 0.44 | 0.104 | 100 | 25 | Accepted |
| 1.10 Long-term residence in an area with a high incidence of esophageal cancer increases the risk of developing esophageal cancer. | 5.00 ± 0.00 | 0.000 | 100 | 100 | Accepted |
| 1. Perceive the severity of illness | 4.45 ± 0.51 | 0.115 | 100 | 45 | Accepted |
| 2.1 Esophageal cancer is a serious disease. | 5.00 ± 0.00 | 0.000 | 100 | 100 | Accepted |
| 2.2 Esophageal cancer can present with the sensation of a foreign body or stagnation in the esophagus. | 4.40 ± 0.50 | 0.114 | 100 | 40 | Accepted |
| 2.3 Esophageal cancer can present with progressive difficulty in swallowing. | 4.45 ± 0.51 | 0.115 | 100 | 45 | Accepted |
| 2.4 Esophageal cancer may be accompanied by gastrointestinal symptoms such as belching and reflux. | 5.00 ± 0.00 | 0.000 | 100 | 100 | Accepted |
| 2.5 Esophageal cancer can present with pain in the retrosternal or interscapular region. | 5.00 ± 0.00 | 0.000 | 100 | 100 | Accepted |
| 2.6 Esophageal cancer can cause malnutrition and weight loss. | 4.50 ± 0.51 | 0.114 | 100 | 50 | Accepted |
| 2.7 Esophageal cancer carries a risk of metastasis and spread. | 5.00 ± 0.00 | 0.000 | 100 | 100 | Accepted |
| 2.8 Esophageal cancer carries a risk of recurrence. | 4.50 ± 0.51 | 0.114 | 100 | 50 | Accepted |
| 2.9 Multiple complications may occur during the treatment of esophageal cancer. | 4.30 ± 0.47 | 0.109 | 100 | 30 | Accepted |
| 2.10 Delayed treatment of esophageal cancer is associated with poor efficacy. | 5.00 ± 0.00 | 0.000 | 100 | 100 | Accepted |
| 2.11 The treatment of esophageal cancer can cause physical discomfort. | 4.60 ± 0.50 | 0.109 | 100 | 60 | Accepted |
| 2.12 Esophageal cancer can lead to a decreased quality of life. | 5.00 ± 0.00 | 0.000 | 100 | 100 | Accepted |
| 2.13 Esophageal cancer can lead to reduced social participation. | 4.40 ± 0.50 | 0.114 | 100 | 40 | Accepted |
| 2.14 Esophageal cancer can interfere with taking on original family responsibilities. | 5.00 ± 0.00 | 0.000 | 100 | 100 | Accepted |
| 2.15 Treatment of esophageal cancer can cause a financial burden to the family. | 5.00 ± 0.00 | 0.000 | 100 | 100 | Accepted |
| 2.16 A diagnosis of esophageal cancer can place a psychological burden on family members. | 4.55 ± 0.51 | 0.112 | 100 | 55 | Accepted |

SD, standard deviation; CV, coefficient of variation
